# Supplementary material for: Risk Aversion and Wealth: Evidence from Person-to-Person Lending Portfolios
Source: Atypon-hosted journal article supplement (doi:10.1287/mnsc.2015.2317), 2010-06-01
Supplement: mnsc.2015.2317-sm-datainstructions.zip [file Data_Code_RiskAversion.pdf › Data_Code_RiskAversion.pdf]

**Risk Aversion and Wealth: Evidence from Person-to-Person Lending Portfolios**  
**by Daniel Paravisini, Veronica Rappoport, and Enrichetta Ravina**

**Definition of the variables in our dataset. Additional variables are created and defined in the code.**

| <b>Variable name</b> | <b>Definition</b>                                                                                                                           |
|----------------------|---------------------------------------------------------------------------------------------------------------------------------------------|
| investor_id          | investor numeric identifier                                                                                                                 |
| gender               | investor's gender                                                                                                                           |
| marital_status       | investor's marital status                                                                                                                   |
| home_owner_renter    | investor's home ownership status; "Renter", "Home Owner"                                                                                    |
| net_worth            | investor's net worth; see code for brackets                                                                                                 |
| age                  | investor's age                                                                                                                              |
| zip_code             | zip code where the investor lives                                                                                                           |
| zhvi_current         | median house price for the zip code where the investor lives                                                                                |
| creation_time        | time and date the investment in a given loan is made by the investor                                                                        |
| creation_method      | "Automatic" vs. "Manual" and "Hybrid" loan selection method                                                                                 |
| amount_invested      | amount invested in a given loan at each creation date                                                                                       |
| nfirms               | number of loan available for investment at a given date                                                                                     |
| assumed_default_rate | historical default rate for loans with a give credit grade based on a long-run validation study conducted on 10 years of credit bureau data |
| r_y3                 | 3 yr US treasury rate                                                                                                                       |
| loan_id              | loan numeric identifier                                                                                                                     |
| credit_grade         | one of 35 risk buckets a loan is assigned to, based on FICO score, credit history, amount requested, ...                                    |
| interest_rate        | interest rate charged to loans assigned a specific credit grade                                                                             |
| amount_requested     | loan amount requested                                                                                                                       |
| amount_borrowed      | loan amount granted (same as amount_requested if loan is granted, 0 otherwise)                                                              |
| monthly_payment      | monthly installment payment                                                                                                                 |
| application_date     | date the borrower applied for a loan on LC                                                                                                  |
| fico_score           | borrower's FICO score                                                                                                                       |
| debt_to_income_ratio | borrower's debt to income ratio from credit bureau                                                                                          |
| monthly_income       | borrower's monthly income from credit bureau                                                                                                |

**\*RISK AVERSION AND WEALTH: EVIDENCE FROM PERSON-TO-PERSON  
LENDING PORTFOLIOS**

**\*by Daniel Paravisini, Veronica Rappoport, and Enrichetta  
Ravina**

```
clear all
set more off
```

```
*Put the original datasets in this directory
global datapath0 "/Volumes/Seagate Backup Plus
Drive/AAA/Lending Club/RISK AVERSION and WEALTH/Revision/New
Table 7"
```

```
*This directory will contain tables and figures generated by
the code
global datapathoutreg "/Volumes/Seagate Backup Plus
Drive/AAA/Lending Club/RISK AVERSION and
WEALTH/Revision/Management Science/REPLICATE/outreg"
```

```
cd "$datapath0"
```

```
*Returns, ns and ps for every choice
*A choice is defined as an individual making an investment
within a time interval (day)
```

```
use "investments_complete.dta", clear
gen investment_date=dofc(creation_time)
encode creation_method, gen(creationmethod)
replace creationmethod=0 if creationmethod==2
drop creation_method
collapse (sum) amount_invested (max) creationmethod, by
(investor_id loan_id investment_date)
sort loan_id
merge loan_id using "cu_loans.dta", nok keep( interest_rate
credit_grade amount_requested monthly_payment)
drop if _merge==1 /*this data is missing because
the cu_loans sample ends earlier*/
drop _merge
sort credit_grade investment_date
merge credit_grade investment_date using
"available_projects_daily", nok keep(nfirms_)
drop if _merge==1 /*same thing*/
drop _merge
rename nfirms_ nfirms_available
sort credit_grade
merge credit_grade using "default_probability_modif.dta"
drop _merge
gen inv_month=mofd(investment_date)
gen pre=inv_month<580
drop if inv_month>=580 & inv_month<=584
drop if inv_month<=572
sort inv_month credit_grade
merge inv_month credit_grade using
"nfirmsavailable_monthgrade.dta", nok keep(nfirms)
drop if _merge==1 /*Censoring at the beginning
```

```

of the sample: 178 obs*/
drop _merge
destring monthly_payment, replace
rename amount_invested investment_amount
egen nz_i_actual=count(investment_amount), by(investor_id
inv_month credit_grade )
compress

/*Keep the "rational" investments + the ones chosen with
portfolio tool.
Drop this command to keep all investments, including cases
where the investor only lends to one borrower */
keep if investment_amount<=50 | creationmethod==0

collapse (sum) investment_amount amount_requested
monthly_payment (mean) creationmethod pre nz_i_actual
nfirms_available nfirms interest_rate assumed_default_rate, by
(investor_id inv_month credit_grade )
sort inv_month
merge inv_month using "riskfreeratesby_inv_month.dta", nok
keep(r_y3)
drop _merge
rename r_y3 rf
replace rf=(1+rf/100)^(1/12)-1

*****Change default rate here
gen def_rate_1y=assumed_default_rate

gen def_rate_1m=(1+def_rate_1y)^(1/12)-1
gen paymnt=amount_requested*((interest_rate/12)*(1+
(interest_rate/12))^36)/(-1+(1+(interest_rate/12))^36)
gen Rz=1*(paymnt/amount_requested)
gen Piz=(1-def_rate_1m)/(1+rf)
gen Xz=Piz*(1-Piz^36)/(1-Piz)
gen ERz=Rz*Piz*(1-Piz^36)/(1-Piz)
gen PihatZ=Piz/(1+rf)
gen Sum_Rz=Rz/(1+rf)
gen VRz= def_rate_1m*(1-def_rate_1m)*(Sum_Rz)^2
set more off
foreach i of numlist 2(1)35 {
    replace Sum_Rz= Sum_Rz + Rz/(1+rf)^`i'
    replace VRz=VRz+def_rate_1m*(1-def_rate_1m)^`i'*(Sum_Rz)^
2
}
set more on
replace VRz=VRz - ERz^2 + (1-def_rate_1m)^36*(Sum_Rz+Rz/(1+rf)
^36)^2
egen W=sum(investment_amount), by(investor_id inv_month)

*****Here we choose how to measure the number of projects
available:
gen nz_i=nfirms

gen VrZ_actual= (1/nz_i_actual) * VRz
gen VrZ= (1/nz_i) * VRz
gen xVrZ_actual=investment_amount*VrZ_actual/W
gen xVrZ=investment_amount*VrZ/W

```

```

gen WxVrz_actual=investment_amount*Vrz_actual
gen WxVrz=investment_amount*Vrz
egen ER=sum(ERz), by(investor_id inv_month)
gen lW=ln(W)
egen C=sum(investment_amount*ERz), by(investor_id inv_month)
gen lC=ln(C)

keep if inv_month<=579

*****Here choose minimum number of buckets in beta
calculation:
egen count_investmonth=count(WxVrz), by(investor_id inv_month)
egen invmonth_id=group(investor_id inv_month) if WxVrz<. &
count_investmonth>=2
egen count_investmonth_auto=count(WxVrz) if creationmethod==0,
by(investor_id inv_month)
egen invmonth_id_auto=group(investor_id inv_month) if WxVrz<.
& count_investmonth_auto>=2 & creationmethod==0
egen count_investmonth_twk=count(WxVrz) if creationmethod>0,
by(investor_id inv_month)
egen invmonth_id_twk=group(investor_id inv_month) if WxVrz<. &
count_investmonth_twk>=2 & creationmethod>0

encode credit_grade, gen(creditgrade)
gen byte highgrade=creditgrade>=19
egen byte tag_invmonth=tag(investor_id inv_month)
egen byte tag_invmonthgrade=tag(investor_id inv_month
highgrade)
compress
keep if invmonth_id<.
sum invmonth_id invmonth_id_auto invmonth_id_twk

*****ARA and THETA ESTIMATION*****
*Beta = Absolute risk aversion
*Alpha = Theta
gen betaim_act=.
gen betaim_act_sd=.
gen alphaim_act=.
gen alphaim_act_sd=.

set more off

*All: Rational Investments with 25 cutoff subsample +
portfolio assignment
forvalues i = 1(1)3745 {
    display `i' "/"3745"
    quietly reg ERz WxVrz_actual if invmonth_id==`i', r
    quietly replace betaim_act=_b[WxVrz_actual] if
invmonth_id==`i'
    quietly replace alphaim_act=_b[_cons] if invmonth_id==`i'
    quietly replace betaim_act_sd=_se[WxVrz_actual] if
invmonth_id==`i'
    quietly replace alphaim_act_sd=_se[_cons] if
invmonth_id==`i'
}

gen betaim_aut=.

```

```

gen betaim_aut_sd=.
gen alphaim_aut=.
gen alphaim_aut_sd=.
*Subset: Automatic Portfolios
forvalues i = 1(1)1363 {
    display `i' "/"1363"
    quietly reg ERz WxVrz_actual if invmonth_id_auto==`i', r
    quietly replace betaim_aut=_b[WxVrz_actual] if
invmonth_id_auto==`i'
    quietly replace alphaim_aut=_b[_cons] if
invmonth_id_auto==`i'
    quietly replace betaim_aut_sd=_se[WxVrz_actual] if
invmonth_id_auto==`i'
    quietly replace alphaim_aut_sd=_se[_cons] if
invmonth_id_auto==`i'
}

```

```

gen betaim_twk=.
gen betaim_twk_sd=.
gen alphaim_twk=.
gen alphaim_twk_sd=.
*Subset: Manual Portfolios
forvalues i = 1(1)2871 {
    display `i' "/"2871"
    quietly reg ERz WxVrz_actual if invmonth_id_twk==`i', r
    quietly replace betaim_twk=_b[WxVrz_actual] if
invmonth_id_twk==`i'
    quietly replace alphaim_twk=_b[_cons] if
invmonth_id_twk==`i'
    quietly replace betaim_twk_sd=_se[WxVrz_actual] if
invmonth_id_twk==`i'
    quietly replace alphaim_twk_sd=_se[_cons] if
invmonth_id_twk==`i'
}
set more on
compress

```

```

sort investor_id
merge investor_id using "cu_investors.dta", nok keep(zip_code)
drop if _merge==2
drop _merge

```

```

**Obtain wealth data from acxiom.dta and zillow
*****

```

```

merge m:1 investor_id using acxiom.dta
drop if _merge==2
drop _merge
gen inc=C-W
gen betaim_act_inc=betaim_act*inc

```

```

encode net_worth, gen(networth)
replace networth=networth+100
replace networth=0 if networth==111
replace networth=2500 if networth==101
replace networth=7500 if networth==108
replace networth=(10000+25000)/2 if networth==103
replace networth=(25000+50000)/2 if networth==106

```

```

replace networth=(50000+100000)/2 if networth==109
replace networth=(250000+500000)/2 if networth==107
replace networth=(500000+1000000)/2 if networth==110
replace networth=(1000000+2000000)/2 if networth==102
replace networth=3000000 if networth==105
gen lnetworth=ln(networth)

sort zip_code inv_month
merge zip_code inv_month using zillow_zhvi_for_monthly.dta
tab _merge
drop if _merge==2
drop _merge

save "$datapath0/investment_riskaversion10
_rationalinv25portfolio.dta", replace

***** FIGURE 2 *****
twoway (sc ERz WxVrz_actual, mlabel(credit_grade) mlabposition
(6)) (lfit ERz WxVrz_actual) if investor_id==285983, title
("Theta = 1.082, ARA = .0661")
graph save "$datapathoutreg/Fig2a.gph", replace
twoway (sc ERz WxVrz_actual, mlabel(credit_grade) mlabposition
(6)) (lfit ERz WxVrz_actual) if betaim_act_inc==
8.542567253112793, title("Theta = 1.068, ARA = .0120")
graph save "$datapathoutreg/Fig2b.gph", replace

twoway (sc ERz WxVrz_act, mlabel(credit_grade) mlabposition
(6)) (lfit ERz WxVrz_act) if betaim_aut_inc<. & investor_id==
70654 & inv_month==576 & creationmethod==0, title("Theta =
1.075, ARA = 0.048")
graph save "$datapathoutreg/Fig2c.gph", replace
twoway (sc ERz WxVrz_act, mlabel(credit_grade) mlabposition
(6)) (lfit ERz WxVrz_act) if betaim_twk_inc<. & investor_id==
70654 & inv_month==576 & creationmethod>0, title("Theta =
1.068, ARA = 0.051")
graph save "$datapathoutreg/Fig2d.gph", replace
clear

***** TABLE 1 *****
* Section A - Borrowers Characteristics
cd "$datapath0"
use "$datapath0/cu_loans.dta", clear
sort loan_id
merge loan_id using "$datapath0/credit_scores.dta"
drop if _merge==2
drop _merge
gen sample=mofd( application_date)>=573 & mofd(
application_date)<=579
gen sample1=mofd( issued_date)>=573 & mofd( issued_date)<=579
tabstat fico_score debt_to_income_ratio monthly_income
amount_borrowed if sample1==1, s(mean sd p50) c(s) save
tabstatmat mat1
xml_tab mat1, save($datapathoutreg/table1_BorChars.xls)
replace

* Section B - Investors' Characteristics
cd "$datapath0"
use "$datapath0/investment_riskaversion10

```

```

_rationalinv25portfolio.dta"

gen byte male=gender=="Male"
gen married=marital_status=="Inferred Married" |
marital_status=="Married"
gen homeowner=home_owner_renter=="Home Owner"
replace networth=networth/1000

preserve
drop if zhvi_current==.
tabstat male age married homeowner networth, s(mean sd p50) c
(s) save
tabstatmat mat1
xml_tab mat1, save($datapathoutreg/table1
_InvChars_firstrows.xls) replace
restore

keep zip_code zhvi_current inv_month
duplicates drop
drop if inv_month>579
keep if inv_month==573 | inv_month==579
sort zip_code inv_month
by zip_code: gen change_in_house_prices=
(zhvi_current/zhvi_current[_n-1])-1
replace zhvi_current=zhvi_current/1000
tabstat zhvi_current change_in_house_prices, s(mean sd p50) c
(s) save
tabstatmat mat1
xml_tab mat1, save($datapathoutreg/table1
_InvChars_last2rows.xls) replace
clear

***** TABLE 2 - Diversified Investments
and "With Real Estate Data" *****
*See the end of the code for teh commands to generate TABLE 2
All Investments

cd "$datapath0"
use "$datapath0/investment_riskaversion10
_rationalinv25portfolio.dta"

*by investor-bucket-month
tabstat investment_amount nz_i_actual interest_rate def_rate_
ly ERz Vrz_actual if betaim_act_inc~=. , s(mean sd p50 n) c(s)
save
tabstatmat mat1
xml_tab mat1, save($datapathoutreg/table2_DivInv_SecA.xls)
replace

tabstat investment_amount nz_i_actual interest_rate def_rate_
ly ERz Vrz_actual if betaim_act_inc~=. & zhvi_current~=. , s
(mean sd p50 n) c(s) save
tabstatmat mat1
xml_tab mat1, save($datapathoutreg/table2_RealEst_SecA.xls)
replace

*by investor-month

```

```

gen avg_return=C/W
egen avg_variance=sum((investment_amount/W)^2*Vrz_actual), by
(inv_ investor_id inv_month)
egen nbuckets=count(investment_amount), by(inv_ investor_id
inv_month)
egen nprojects=sum(nz_i_actual), by(inv_ investor_id inv_month)
keep investor_id zip_code W nbuckets nprojects avg_return
avg_variance betaim_act_inc zhvi_current inv_month
duplicates drop

```

```

tabstat W nbuckets nprojects avg_return avg_variance if
betaim_act_inc~=., s(mean sd p50 n) c(s) save
tabstatmat mat1
xml_tab mat1, save($datapathoutreg/table2_DivInv_SecB.xls)
replace

```

```

tabstat W nbuckets nprojects avg_return avg_variance if
betaim_act_inc~=. & zhvi_current~=., s(mean sd p50 n) c(s)
save
tabstatmat mat1
xml_tab mat1, save($datapathoutreg/table2_RealEst_SecB.xls)
replace

```

```
clear
```

```

cd "$datapath0"
use "$datapath0/investment_riskaversion10
_rationalinv25portfolio.dta"

```

```

**We drop duplicates to obtain values that are investor x
month specific
keep investor_id inv_month inc betaim_act betaim_act_inc
alphaim_act W lnetworth zip home_owner_renter zhvi_current
duplicates drop
duplicates tag investor_id inv_month betaim_act, gen(dupl)
drop if dupl==1
drop dupl
egen byte tag_investor=tag(investor_id)

```

\*\*\*\*\* TABLE 3 \*\*\*\*\*

```

preserve
keep if zhvi_current~=. & betaim_act~=.
collapse (mean) betaim_act betaim_act_inc inc alphaim_act
zhvi_current, by(inv_ investor_id inv_month)
tabstat betaim_act alphaim_act inc betaim_act_inc, c(v) stat
(mean sd p1 p10 p25 p50 p75 p90 p99 n) save
tabstatmat mat1
xml_tab mat1, save($datapathoutreg/table3.xls) replace
restore

```

\*\*\*\*\* TABLE 4 \*\*\*\*\*

```

preserve
keep if zhvi_current~=. & betaim_act~=.
tabstat betaim_act alphaim_act inc betaim_act_inc, c(v) s(mean
sd) by(inv_month) nototal save
tabstatmat mat1

```



```

xml_tab mat1, save($datapathoutreg/table4.xls) replace
restore
clear

***** TABLE 5 *****

cd "$datapath0"
use investment_riskaversion10_rationalinv25portfolio.dta

keep if zhvi_current~=. & betaim_act~=.

keep alphaim_twk alphaim_aut betaim_aut betaim_twk investor_id
inv_month
duplicates drop
sort investor_id inv_month
by investor_id inv_month: egen betaim_autN=mean(betaim_aut)
by investor_id inv_month: egen betaim_twkN=mean(betaim_twk)
by investor_id inv_month: egen alphaim_autN=mean(alphaim_aut)
by investor_id inv_month: egen alphaim_twkN=mean(alphaim_twk)
keep investor_id inv_month *N
duplicates drop
gen alpha_diff=alphaim_twkN-alphaim_autN
gen beta_diff=betaim_twkN-betaim_autN
keep if alpha_diff~=. & beta_diff~=.

tabstat alphaim_twkN alphaim_autN alpha_diff betaim_twkN
betaim_autN beta_diff, s(mean sd p1 p5 p25 p50 p75 p95 p99 n)
c(s) save
tabstatmat mat1
xml_tab mat1, save($datapathoutreg/table5_all.xls) replace
ttest alphaim_twkN=alphaim_autN
ttest betaim_twkN=betaim_autN

tabstat alphaim_twkN alphaim_autN alpha_diff betaim_twkN
betaim_autN beta_diff if inv_month<=575, s(mean sd p1 p5 p25
p50 p75 p95 p99 n) c(s) save
tabstatmat mat1
xml_tab mat1, save($datapathoutreg/table5_pre.xls) replace
ttest alphaim_twkN=alphaim_autN if inv_month<=575
ttest betaim_twkN=betaim_autN if inv_month<=575

tabstat alphaim_twkN alphaim_autN alpha_diff betaim_twkN
betaim_autN beta_diff if inv_month>575, s(mean sd p1 p5 p25
p50 p75 p95 p99 n) c(s) save
tabstatmat mat1
xml_tab mat1, save($datapathoutreg/table5_post.xls) replace
ttest alphaim_twkN=alphaim_autN if inv_month>575
ttest betaim_twkN=betaim_autN if inv_month>575

*Figure 3a and Figure 3b
kdensity beta_diff, nor title ("") xtitle("ARA Non-Automatic -
ARA Automatic")
graph save Graph "$datapathoutreg/ARA_Fig3a.gph"
kdensity alpha_diff, nor title ("") xtitle("Theta Non-
Automatic - Theta Automatic")
graph save Graph "$datapathoutreg/Theta_Fig3b.gph"
clear

```

\*\*\*\*\* FIGURE 4a and FIGURE 4b

```

cd "$datapathoutreg"
use "$datapath/investment_riskaversion10
_rationalinv25portfolio.dta"

gen lhouseprice=ln(zhvi_current)

winsor betaim_act_inc, gen(betaim_act_inc2) p(0.01)
winsor betaim_act, gen(betaim_act2) p(0.01)

winsor betaim_act_inc, gen(betaim_act_inc3) p(0.05)
winsor betaim_act, gen(betaim_act3) p(0.05)

*Bandwidth =0.75
twoway (lpolyci betaim_act2 lnetworth if lnetworth>10 &
tag_invmonth==1, degree(2) bwidth(0.75) ciplot(rline) )
(lpolyci betaim_act2 lhouseprice if lhouseprice>10 &
lhouseprice <14.5 & tag_invmonth==1, degree(0) bwidth(0.75)
ciplot(rline)) if home_owner_renter=="Home Owner", ytitle
("ARA") xtitle("log Net Worth/ log Median House Prices")
legend(label(1 "95% C.I.") label(2 "ARA and Net Worth") label
(3 "ARA and House Prices") order (2 3 1))
graph save "$datapathoutreg/Fig4a_ARA_HousePrices.gph",
replace
twoway (lpolyci betaim_act_inc2 lnetworth if lnetworth>10 &
tag_invmonth==1, degree(2) bwidth(0.75) ciplot(rline) )
(lpolyci betaim_act_inc2 lhouseprice if lhouseprice>10 &
lhouseprice <14.5 & tag_invmonth==1, degree(0) bwidth(0.75)
ciplot(rline)) if home_owner_renter=="Home Owner", ytitle
("RRA") xtitle("log Net Worth/ log Median House Prices")
legend(label(1 "95% C.I.") label(2 "RRA and Net Worth") label
(3 "RRA and House Prices") order (2 3 1))
graph save "$datapathoutreg/Fig4b_RRA_HousePrices.gph",
replace
clear

```

\*\*\*\*\* TABLE 6 \*\*\*\*\*

```

cd "$datapath0"
use "$datapath0/investment_riskaversion10
_rationalinv25portfolio.dta"
**We drop duplicates to obtain values that are investor x
month specific
keep investor_id inv_month inc betaim_act betaim_act_inc
alphaim_act W lnetworth zip home_owner_renter zhvi_current
duplicates drop
duplicates tag investor_id inv_month betaim_act, gen(dupl)
drop if dupl==1
drop dupl
egen byte tag_investor=tag(investor_id)

preserve
egen zip_g=group(zip)
**Aggregating at the investor level
collapse (mean) betaim_act betaim_act_inc W zhvi_current
lnetworth zip_g, by(investor_id)

```

```
foreach i of varlist betaim_act betaim_act_inc W zhvi_current
{
gen l`i'=ln(`i')
}
```

```
reg lbetaim_act lnetworth if zhvi_current!=., r cl(zip)
outreg2 lnetworth using "$datapathoutreg/table6.xls", replace
ct(lARA) bdec(3) aster(coef) se e( r2_a r2_o r2_b r2_w )
reg lbetaim_act_inc lnetworth if lbetaim_act!=. &
zhvi_current!=., r cl(zip)
outreg2 lnetworth using "$datapathoutreg/table6.xls", append
ct(lRRA) bdec(3) aster(coef) se e( r2_a r2_o r2_b r2_w )
reg lW lnetworth if lbetaim_act!=. & zhvi_current!=., r cl
(zip)
outreg2 lnetworth using "$datapathoutreg/table6.xls", append
ct(lW) bdec(3) aster(coef) se e( r2_a r2_o r2_b r2_w )
ivregress 2sls lbetaim_act (lnetworth=lnzhvi_current), r cl
(zip)
outreg2 lnetworth using "$datapathoutreg/table6.xls", append
ct(IV: lARA) bdec(3) aster(coef) se e( r2_a r2_o r2_b r2_w )
ivregress 2sls lbetaim_act_inc (lnetworth=lnzhvi_current) if
lbetaim_act!=., r cl(zip)
outreg2 lnetworth using "$datapathoutreg/table6.xls", append
ct(IV: lRRA) bdec(3) aster(coef) se e( r2_a r2_o r2_b r2_w )
ivregress 2sls lW (lnetworth=lnzhvi_current) if lbetaim_act!=.
, r cl(zip)
outreg2 lnetworth using "$datapathoutreg/table6.xls", append
ct(IV: lW) bdec(3) aster(coef) se e( r2_a r2_o r2_b r2_w )
reg lnetworth lzhvi_current if lbetaim_act!=., r cl(zip)
outreg2 lzhvi_current using "$datapathoutreg/table6.xls",
append ct(FS: lnetworth) bdec(3) aster(coef) se e( r2_a r2_o
r2_b r2_w )
```

restore

\*\*\*\*\* TABLE 7

\*\*\*\*\*

```
preserve
gen trend=0
forvalues i=573(1)591 {
replace trend=`i'-570 if inv_month==`i'
}
```

```
foreach i of varlist betaim_act betaim_act_inc W zhvi_current
trend {
gen l`i'=ln(`i')
}
```

\*\*Tag investors that appear at least twice

```
bys investor_id: egen n_invest=count(lbetaim_act)
```

```
xtset investor_id inv_month
```

```
reg lbetaim_act lzhvi_current ltrend if n_invest>1, r cl(zip)
outreg2 lzhvi_current using "$datapathoutreg/table7tr1
_Old.xls", replace ct(lARA tr1) bdec(3) aster(coef) se e( r2_a
```

```

r2_o r2_b r2_w )
reg lbetaim_act_inc lzhvi_current ltrend if n_invest>1 &
lbetaim_act!=., r cl(zip)
outreg2 lzhvi_current using "$datapathoutreg/table7tr1
_Old.xls", append ct(lRRA tr1) bdec(3) aster(coef) se e( r2_a
r2_o r2_b r2_w )
reg lW lzhvi_current ltrend if n_invest>1 & lbetaim_act!=., r
cl(zip)
outreg2 lzhvi_current using "$datapathoutreg/table7tr1
_Old.xls", append ct(lW tr1) bdec(3) aster(coef) se e( r2_a r2
_o r2_b r2_w )
xtreg lbetaim_act lzhvi_current ltrend if n_invest>1, fe r cl
(zip)
outreg2 lzhvi_current using "$datapathoutreg/table7tr1
_Old.xls", append ct(FE + lARA + tr1) bdec(3) aster(coef) se e
( r2_a r2_o r2_b r2_w )
xtreg lbetaim_act_inc lzhvi_current ltrend if n_invest>1 &
lbetaim_act!=., fe r cl(zip)
outreg2 lzhvi_current using "$datapathoutreg/table7tr1
_Old.xls", append ct(FE + lRRA + tr1) bdec(3) aster(coef) se e
( r2_a r2_o r2_b r2_w )
xtreg lW lzhvi_current ltrend if n_invest>1 & lbetaim_act!=. ,
fe r cl(zip)
outreg2 lzhvi_current using "$datapathoutreg/table7tr1
_Old.xls", append ct(FE + lW + tr1) bdec(3) aster(coef) se e(
r2_a r2_o r2_b r2_w )

```

```
clear
```

```

*****
*** APPENDIX
*****

```

```

***** Amount Invested in LC
cd "$datapath0"
use "$datapath0/investment_riskaversion10
_rationalinv25portfolio.dta"
drop if zhvi_current==.
*Averaging by investor and IV:
foreach var of varlist betaim_act W{
    egen m_`var'=mean(`var'), by(investor_id)
    gen lm_`var'=ln(m_`var')
}
egen byte tag_investor=tag(investor_id)
reg lm_W lm_betaim_act if home_owner_renter=="Home Owner" &
inv_month<579 & tag_investor==1, r cl(zip) level(99)
clear
***** Figure 7
winsor betaim_act, gen(betaim_act2) p(0.01)
winsor betaim_act, gen(betaim_act3) p(0.05)

egen byte tag_invmonth=tag(investor_id inv_month)
gen INV=ln(investment_amount)
twoway (lpolyci lm_W betaim_act3, degree(2) bwidth(0.75)
ciplot(rline) ) if tag_invmonth==1 & home_owner_renter=="Home
Owner", ytitle("ln(Investment)") xtitle("ARA") legend(label(1
"95% C.I.") label(2 "ln(Investment)") order (1 2))

```

```
graph save "$datapathoutreg/FigC1.gph", replace
```

\*See the outreg for table 6 and table 7 for the first two and last two columns of Table C.1, respectively.

```
***** Rationality Test *****
```

```
program make_matrices
    tempvar tag_bucketmonth
    egen `tag_bucketmonth'=tag(credit_grade inv_month)
    preserve
    keep if `tag_bucketmonth'==1
    keep credit_grade inv_month ERz
    sort inv_month credit_grade
    reshape wide ERz, i(credit_grade) j(inv_month)
    mkmat ERz573 - ERz591, matrix(RET)
    restore
    preserve
    keep if `tag_bucketmonth'==1
    keep credit_grade inv_month VRz
    sort inv_month credit_grade
    reshape wide VRz, i(credit_grade) j(inv_month)
    mkmat VRz573 - VRz591, matrix(VAR)
    restore
end
```

```
cd "$datapath"
use "$datapath0/investment_riskaversion10
_rationalinv25portfolio.dta", clear
make_matrices
keep investor_id inv_month invmonth_id creditgrade
investment_amount creationmethod betaim_act betaim_act_sd
alphaim_act alphaim_act_sd
drop if invmonth_id==.

egen cm=sum(creationmethod), by(invmonth_id )
keep if cm>0
drop creationmethod cm

reshape wide investment_amount, i(invmonth_id) j(creditgrade)
forvalues h = 1(1)35 {
    gen t`h'= RET[`h',inv_month-572] - alphaim_act -
    betaim_act*25*VAR[`h',inv_month-572] if
    investment_amount`h'==.
}
forvalues h = 1(1)35 {
    gen tsd`h'= ( alphaim_act_sd^2 + betaim_act_sd^2*( 25*VAR
    [`h',inv_month-572])^2 )^.5 if investment_amount`h'==.
}

drop investment_amount*
reshape long t tsd, i(invmonth_id) j(creditgrade)
keep if t<.
keep if inv_month<=579
replace tsd=. if tsd==0
```

```

gen tneg=t<0
sum tneg, d
gen tmin=t-1.31*tsd
gen tneg_min=tmin<0
egen n=count(t), by(invmonth_id)
gen t_RET=t/(RET[creditgrade,inv_month-572]-1)

*Desc Stats
gen ERz=RET[creditgrade,inv_month-572]
gen VRz=VAR[creditgrade,inv_month-572]
tabstat ERz VRz , s(mean sd p1 p25 p50 p75 p99 n) c(s)

sum tneg , d

sum t , d
ttest t=0
sum t if t>0, d

*Investment-by-investment:
egen invmonth_id_test=group(invmonth_id)
sum invmonth_id_test
gen tstat=.
set more off
forvalues i = 1(1)2938 {
    di `i'
    quietly ttest t=0 if invmonth_id_test==`i'
    quietly replace tstat=r(t) if invmonth_id_test==`i'
}
set more on
egen tag_test=tag(invmonth_id_test)
sum tstat if tag_test==1, d
ins tstat if tag_test==1

ins tmin
sum tmin , d
sum t if tmin>0 & tmin<., d
sum t_RET if tmin>0 & tmin<., d

```

\*\*\*\*\* Table 2 - All

```

Investments *****
*This section requires to recreate the dataset keeping all
investments, not only the diversified ones.
use "investments_complete.dta", clear
gen investment_date=dofc(creation_time)
encode creation_method, gen(creationmethod)
replace creationmethod=0 if creationmethod==2
drop creation_method
collapse (sum) amount_invested (max) creationmethod, by
(investor_id loan_id investment_date)
sort loan_id
merge loan_id using "cu_loans.dta", nok keep( interest_rate
credit_grade amount_requested monthly_payment)
drop if _merge==1 /*this data is missing because
the cu_loans sample ends earlier*/
drop _merge
sort credit_grade investment_date
merge credit_grade investment_date using

```

```

"available_projects_daily", nok keep(nfirms_)
drop if _merge==1 /*same thing*/
drop _merge
rename nfirms_ nfirms_available
sort credit_grade
merge credit_grade using "default_probability_modif.dta"
drop _merge
gen inv_month=mofd(investment_date)
gen pre=inv_month<580
drop if inv_month>=580 & inv_month<=584
drop if inv_month<=572
sort inv_month credit_grade
merge inv_month credit_grade using
"nfirmsavailable_monthgrade.dta", nok keep(nfirms)
drop if _merge==1 /*Censoring at the beginning
of the sample: 178 obs*/
drop _merge
destring monthly_payment, replace
rename amount_invested investment_amount
egen nz_i_actual=count(investment_amount), by(investor_id
inv_month credit_grade )
compress

/*Keep the "rational" investments + the ones chosen with
portfolio tool.
Drop this command to keep all investments, including cases
where the investor only lends to one borrower */
*keep if investment_amount<=50 | creationmethod==0

collapse (sum) investment_amount amount_requested
monthly_payment (mean) creationmethod pre nz_i_actual
nfirms_available nfirms interest_rate assumed_default_rate
lc_base_rate default_rate_1y interest_rate_table, by
(investor_id inv_month credit_grade )
sort inv_month
merge inv_month using "riskfreeratesby_inv_month.dta", nok
keep(r_y3)
drop _merge
rename r_y3 rf
replace rf=(1+rf/100)^(1/12)-1

*****Change default rate here
gen def_rate_1y=assumed_default_rate

gen def_rate_1m=(1+def_rate_1y)^(1/12)-1
gen paymnt=amount_requested*((interest_rate/12)*(1+
(interest_rate/12))^36)/(-1+(1+(interest_rate/12))^36)
gen Rz=1*(paymnt/amount_requested)
gen Piz=(1-def_rate_1m)/(1+rf)
gen Xz=Piz*(1-Piz^36)/(1-Piz)
gen ERz=Rz*Piz*(1-Piz^36)/(1-Piz)
gen PihatZ=Piz/(1+rf)
gen Sum_Rz=Sum_Rz/(1+rf)
gen VRz= def_rate_1m*(1-def_rate_1m)*(Sum_Rz)^2
set more off
foreach i of numlist 2(1)35 {
    replace Sum_Rz= Sum_Rz + Rz/(1+rf)^^i'

```

```

        replace VRz=VRz+def_rate_lm*(1-def_rate_lm)^(i)*(Sum_Rz)^
2
    }
set more on
replace VRz=VRz - ERz^2 + (1-def_rate_lm)^36*(Sum_Rz+Rz/(1+rf)
^36)^2
egen W=sum(investment_amount), by(investor_id inv_month)

*****Here we choose how to measure the number of projects
available:
gen nz_i=nfirms

gen Vrz_actual= (1/nz_i_actual) * VRz
gen Vrz= (1/nz_i) * VRz
gen xVrz_actual=investment_amount*Vrz_actual/W
gen xVrz=investment_amount*Vrz/W
gen WxVrz_actual=investment_amount*Vrz_actual
gen WxVrz=investment_amount*Vrz
egen ER=sum(ERz), by(investor_id inv_month)
gen lW=ln(W)
egen C=sum(investment_amount*ERz), by(investor_id inv_month)
gen lC=ln(C)

keep if inv_month<=579

*****Here choose minimum number of buckets in beta
calculation:
egen count_investmonth=count(WxVrz), by(investor_id inv_month)
egen invmonth_id=group(investor_id inv_month) if WxVrz<. &
count_investmonth>=2
egen count_investmonth_auto=count(WxVrz) if creationmethod==0,
by(investor_id inv_month)
egen invmonth_id_auto=group(investor_id inv_month) if WxVrz<.
& count_investmonth_auto>=2 & creationmethod==0
egen count_investmonth_twk=count(WxVrz) if creationmethod>0,
by(investor_id inv_month)
egen invmonth_id_twk=group(investor_id inv_month) if WxVrz<. &
count_investmonth_twk>=2 & creationmethod>0

encode credit_grade, gen(creditgrade)
gen byte highgrade=creditgrade>=19
egen byte tag_invmonth=tag(investor_id inv_month)
egen byte tag_invmonthgrade=tag(investor_id inv_month
highgrade)
compress
keep if invmonth_id<.
sum invmonth_id invmonth_id_auto invmonth_id_twk

*****ARA and THETA ESTIMATION*****
*Beta = Absolute risk aversion
*Alpha = Theta
gen betaim_act=.
gen betaim_act_sd=.
gen alphaim_act=.
gen alphaim_act_sd=.

set more off

```



```

*All: Rational Investments with 25 cutoff subsample +
portfolio assignment
forvalues i = 1(1)4256 {
    display `i' "/"4256"
    quietly reg ERz WxVrz_actual if invmonth_id==`i', r
    quietly replace betaim_act=_b[WxVrz_actual] if
invmonth_id==`i'
    quietly replace alphaim_act=_b[_cons] if invmonth_id==`i'
    quietly replace betaim_act_sd=_se[WxVrz_actual] if
invmonth_id==`i'
    quietly replace alphaim_act_sd=_se[_cons] if
invmonth_id==`i'
}

gen betaim_aut=.
gen betaim_aut_sd=.
gen alphaim_aut=.
gen alphaim_aut_sd=.
*Subset: Automatic Portfolios
forvalues i = 1(1)1359 {
    display `i' "/"1359"
    quietly reg ERz WxVrz_actual if invmonth_id_auto==`i', r
    quietly replace betaim_aut=_b[WxVrz_actual] if
invmonth_id_auto==`i'
    quietly replace alphaim_aut=_b[_cons] if
invmonth_id_auto==`i'
    quietly replace betaim_aut_sd=_se[WxVrz_actual] if
invmonth_id_auto==`i'
    quietly replace alphaim_aut_sd=_se[_cons] if
invmonth_id_auto==`i'
}

gen betaim_twk=.
gen betaim_twk_sd=.
gen alphaim_twk=.
gen alphaim_twk_sd=.
*Subset: Manual Portfolios
forvalues i = 1(1)3460 {
    display `i' "/"3460"
    quietly reg ERz WxVrz_actual if invmonth_id_twk==`i', r
    quietly replace betaim_twk=_b[WxVrz_actual] if
invmonth_id_twk==`i'
    quietly replace alphaim_twk=_b[_cons] if
invmonth_id_twk==`i'
    quietly replace betaim_twk_sd=_se[WxVrz_actual] if
invmonth_id_twk==`i'
    quietly replace alphaim_twk_sd=_se[_cons] if
invmonth_id_twk==`i'
}
set more on
compress

sort investor_id
merge investor_id using "cu_investors.dta", nok keep(zip_code)
drop if _merge==2
drop _merge

```

```

**Obtain wealth data from acxiom.dta and zillow
*****
merge m:1 investor_id using acxiom.dta
drop if _merge==2
drop _merge
gen inc=C-W
gen betaim_act_inc=betaim_act*inc

encode net_worth, gen(networth)
replace networth=networth+100
replace networth=0 if networth==111
replace networth=2500 if networth==101
replace networth=7500 if networth==108
replace networth=(10000+25000)/2 if networth==103
replace networth=(25000+50000)/2 if networth==106
replace networth=(50000+100000)/2 if networth==109
replace networth=(250000+500000)/2 if networth==107
replace networth=(500000+1000000)/2 if networth==110
replace networth=(1000000+2000000)/2 if networth==102
replace networth=3000000 if networth==105
gen lnetworth=ln(networth)

sort zip_code inv_month
merge zip_code inv_month using zillow_zhvi_for_monthly.dta
tab _merge
drop if _merge==2
drop _merge

save "$datapath0/investment_riskaversion10
_rationalinv25portfolioBIS.dta", replace

*by investor-bucket-month
tabstat investment_amount nz_i_actual interest_rate def_rate_
ly ERz Vrz_actual if betaim_act_inc~=. , s(mean sd p50 n) c(s)
save
tabstatmat mat1
xml_tab mat1, save($datapathoutreg/table2_A1Inv_SecA.xls)
replace

*by investor-month
gen avg_return=C/W
egen avg_variance=sum((investment_amount/W)^2*Vrz_actual), by
(investor_id inv_month)
egen nbuckets=count(investment_amount), by(investor_id
inv_month)
egen nprojects=sum(nz_i_actual), by(investor_id inv_month)
keep investor_id zip_code W nbuckets nprojects avg_return
avg_variance betaim_act_inc inv_month
duplicates drop

tabstat W nbuckets nprojects avg_return avg_variance if
betaim_act_inc~=. , s(mean sd p50 n) c(s) save
tabstatmat mat1
xml_tab mat1, save($datapathoutreg/table2_AllInv_SecB.xls)
replace

```

clear
